# Supplementary material
Source: publisher site journal article supplement (https://www.dovepress.com/article/272149)
Supplement: Supplementary file 1 [file get_supplementary_file.php]

| Table S1. patients baseline characteristics of CHANGE-2 | | | |
| --- | --- | --- | --- |
| Characteristic | **Cetuximab+CT**  **N=164 (%)** | **CT**  **N=79 (%)** | **Total**  **N=243 (%)** |
| Sex |  |  |  |
| Male | 146(89.0) | 67(84.8) | 213(87.7) |
| Female | 18(11.0) | 12(15.2) | 30(12.3) |
| Age |  |  |  |
| Mean±SD | 57.1±9.52 | 57.0±8.99 | 57.1±9.34 |
| Median | 57.0 | 58.0 | 57.0 |
| Range | 28-82 | 34-77 | 28-82 |
| Age categories |  |  |  |
| <65 years | 127(77.4) | 62(78.5) | 189(77.8) |
| ≥65 years | 37(22.6) | 17(21.5) | 54(22.2) |
| ECOG performance status |  |  |  |
| 0 | 48(29.3) | 21(26.6) | 69(28.4) |
| 1 | 116(70.7) | 58(73.4) | 174(71.6) |
| Primary tumor site |  |  |  |
| Oral cavity | 46(28.0) | 21(26.6) | 67(27.6) |
| Oropharynx | 25(15.2) | 17(21.5) | 42(17.3) |
| Hypopharynx | 42(25.6) | 19(24.1) | 61(25.1) |
| Larynx | 40(24.4) | 18(22.8) | 58(23.9) |
| Other | 11(6.7) | 4(5.1) | 15(6.2) |
| Extent of disease |  |  |  |
| Recurrent only | 73(44.5) | 41(51.9) | 114(46.9) |
| Nonrecurrent metastatic | 47(28.7) | 16(20.3) | 63(25.9) |
| Recurrent with metastases | 44(26.8) | 22(27.8) | 66(27.2) |
| All data sourced from CHANGE-2 trial.1,2 CT: chemotherapy; ECOG: Eastern Cooperative Oncology Group; SD: standard deviation. | | | |

| Table S2. The incidence of adverse events | | |
| --- | --- | --- |
| Grade ≥ 3 AEs | Cetuximab+CT | CT |
| Neutropenia | 13.5 | 6.6 |
| Anemia | 11.7 | 9.2 |
| Leukopenia | 11.0 | 7.9 |
| Neutrophil count decreased | 6.7 | 13.2 |
| All main adverse events were grade 3 to 5. The data derived from CHANGE-2 trial.1,2 | | |

| Table S3. Model input parameters and analysis result based on survival data of EXTREME trial | | | | | | | | | |
| --- | --- | --- | --- | --- | --- | --- | --- | --- | --- |
| Regimen | Distribution | | Shape | Scale | AIC | Reference | QALYs | Cost, $ | ICER($/QALY) |
| Chemotherapy alone | PFS | Weibull | 1.548 | 6.528 | 945.4 | EXTREME3 | 0.494 | 3,217 |  |
| OS | Log-logis | 1.614 | 10.423 | 1309.3 | EXTREME3 |
| Cetuximab+chemotherapy | PFS | Weibull | 1.510 | 9.690 | 1026.5 | EXTREME3 | 0.586 | 25,673 | 244,087 |
| OS | Weibull | 1.188 | 19.294 | 1321.9 | EXTREME3 |
| AIC: Akaike information criterion; QALY: quality-adjusted life year; ICER: incremental cost-effectiveness ratio. The data derived from EXTREME trial.3 | | | | | | | | | |

Reference

1. Guo Y. Cetuximab + chemotherapy as a first-line (1L) treatment for recurrent/metastatic squamous cell carcinoma of the head and neck (R/M SCCHN) in China: final overall survival analysis of the randomized, phase 3 CHANGE-2 trial. *CSCO*. 2019;abstract NO.6018

2. ClinicalTrials.gov. Phase III Trial to Assess Efficacy and Safety of Cetuximab for the Treatment of Chinese Participants With Head and Neck Cancer (CHANGE-2). Available from: <https://clinicaltrials.gov/ct2/show/results/NCT02383966?term=CHANGE-2&draw=2&rank=3>. Accessed 20 December, 2019.

3. Vermorken JB, Mesia R, Rivera F, et al. Platinum-based chemotherapy plus cetuximab in head and neck cancer. *N Engl J Med*. Sep 11 2008;359(11):1116-27. doi:10.1056/NEJMoa0802656
